# Supplementary material for: Global and regional brain metabolic scaling and its functional consequences
Source: PubMed Central journal article supplement (PMC1884139; doi:10.1186/1741-7007-5-18), 2007-05-09
Supplement: 1741-7007-5-18-S1.pdf [file 1741-7007-5-18-S1.pdf]

## **Supplementary information for**

**“Global and regional brain metabolic scaling and its functional consequences”**

Jan Karbowski

*Sloan-Swartz Center for Theoretical Neurobiology,  
Division of Biology 216-76,  
California Institute of Technology, Pasadena, CA 91125, USA*

## 1. Supplementary Figures.

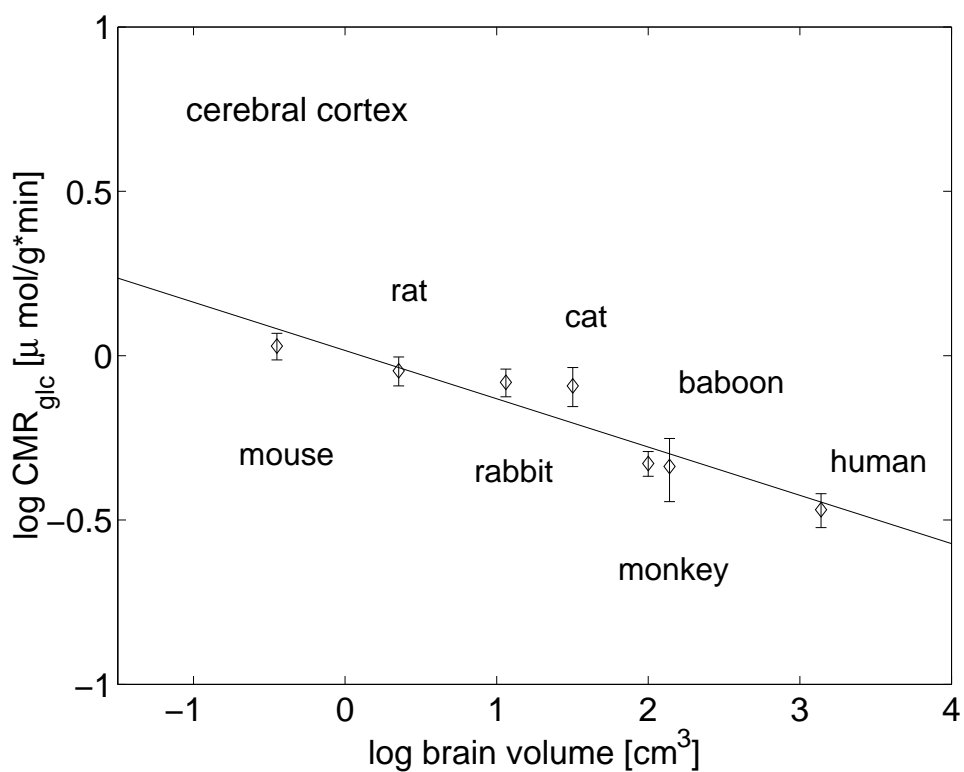

**Figure S1.** Allometric scaling of the average glucose utilization in the cerebral cortex with brain volume. The scaling exponent is  $-0.15 \pm 0.02$  ( $R^2 = 0.89$ ,  $p = 0.0015$ ) and its 95% confidence interval is  $(-0.21, -0.09)$ . Thus, the exponent is statistically identical to that in Fig. 2E in the main text, although the methods of averaging differ.

For the purpose of the discussion in the main text regarding neural function, we also determine the scaling of the neural density  $\rho_n$  with the brain volume  $V_b$ , which has been a subject of some controversy recently. The older data by Tower (1954) indicated that  $\rho_n \propto V_b^{-0.32}$ . The later data by Rockel et al. (1980) indicated that the surface density of neurons was brain size independent, which suggests that  $\rho_n$  should scale with  $V_b$  the same way as does the inverse of cortical thickness. Since the latter scales with brain volume with the exponent  $\approx 0.10$  (Schlenska, 1974; Prothero, 1997; Hofman, 1988), the Rockel et al. (1980) data imply that  $\rho_n \propto V_b^{-0.10}$ . However, both of these results may suffer from a small sample of animals used (11 in Tower, and only 5 in Rockel). Additionally, Rockel et al. (1980) counted the number of neuronal cell bodies in a narrow strip ( $\approx 30 \mu\text{m}$ ) through the depth of the neocortex, which does not take into account horizontal spacing between neurons and may be the source of discrepancy between the two results.

In Fig. S2, volume and surface densities of neurons in the gray matter are plotted as a function of brain volume for a larger number of animals, using more recent data of Haug (taken from Figs. 7 and 13 in Haug, 1987). Despite scattered data points there exist significant correlations between both densities and brain volume, and the scaling exponents are, surprisingly, statistically identical  $\approx -0.20$ . The scaling exponent for the surface density is compatible with the result of Tower (1954), if we take the cortical thickness scaling into account, i.e., in this case  $\rho_n \propto V_b^{-0.32}$ . On the other hand, the scaling exponent for the volume density  $\rho_n$  is exactly in the middle of the values obtained by Tower (1954) and implicated by Rockel et al. (1980), i.e.,  $\rho_n \propto V_b^{-0.20 \pm 0.03}$ . We conclude that neural density decreases with increasing brain volume with the allometric exponent in the range between  $-0.32$  and  $-0.20$ .

Tower DB (1954) Structural and functional organization of mammalian cerebral cortex: the correlation of neurone density with brain size. *J. Comp. Neurol.* **101**: 19-52.

Rockel AJ, Hiorns RW, Powell TPS (1980) The basic uniformity in structure of the neocortex. *Brain* **103**: 221-244.

Haug H (1987) Brain sizes, surfaces, and neuronal sizes of the cortex cerebri: A stereological investigation of Man and his variability and a comparison with some mammals (primates, whales, marsupials, insectivores, and one elephant). *Am. J. Anatomy* **180**: 126-142.

A

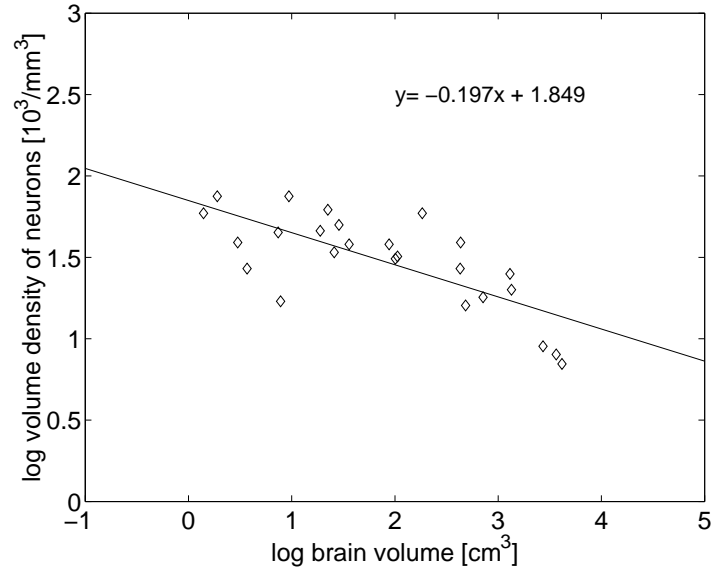

B

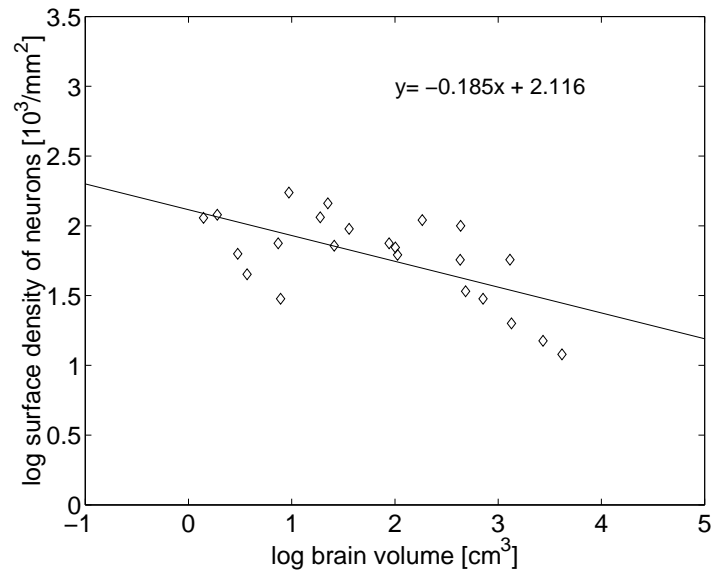

**Figure S2.** Scaling of the cortical neuronal densities with brain volume. The data are taken from Haug (1987) and re-plotted in a log-log scale. (A) Volume density scales with brain volume with the exponent  $-0.20 \pm 0.03$  ( $y = -0.20x + 1.85$ ,  $R^2 = 0.540$ ,  $p < 10^{-4}$ ,  $N = 25$ ). The 95% confidence interval for the scaling exponent is  $(-0.28, -0.12)$ . (B) Surface density scales with brain volume with the

exponent  $-0.19 \pm 0.04$  ( $y = -0.19x + 2.12$ ,  $R^2 = 0.392$ ,  $p = 0.0014$ ,  $N = 23$ ).  
The 95% confidence interval for the scaling exponent is  $(-0.29, -0.08)$ . Note  
that both exponents are almost identical.

## 2. Supplementary Tables.

Table S1.

Brain oxygen consumption data in adult awake unanesthetized animals.

| Species | Oxygen consumption<br>( <i>ml/g · min</i> ) | Total oxygen<br>consumption<br>( <i>ml/min</i> ) | Reference                              |
|---------|---------------------------------------------|--------------------------------------------------|----------------------------------------|
| rat     | 0.084 ± 0.019                               | 0.190                                            | Linde et al 1999                       |
| cat     | 0.058 ± 0.006                               | 1.844                                            | Stingele et al 1996                    |
| dog     | 0.061 ± 0.002                               | 4.392                                            | Nakanishi et al 1997                   |
| monkey  | 0.060 ± 0.005                               | 6.000                                            | Nemoto et al 1994                      |
| sheep   | 0.049 ± 0.007                               | 5.586                                            | Pell et al 1983                        |
| baboon  | 0.034 ± 0.006                               | 4.658                                            | Sahlin et al 1987                      |
| human   | 0.035 ± 0.005                               | 48.615                                           | Clarke et al 1994<br>Madsen et al 1991 |

Table S2.

Brain glucose utilization data in adult awake unanesthetized animals.

| Species  | Glucose utilization<br>( $\mu\text{mol/g} \cdot \text{min}$ ) | Total glucose<br>utilization<br>( $\mu\text{mol/min}$ ) | Reference                                                    |
|----------|---------------------------------------------------------------|---------------------------------------------------------|--------------------------------------------------------------|
| mouse    | 0.89 ± 0.14                                                   | 0.32                                                    | Bouilleret et al 2000                                        |
| rat      | 0.68 ± 0.04                                                   | 1.52                                                    | Nehlig et al 1988<br>Waschke et al 1993<br>Levant et al 2004 |
| squirrel | 0.60 ± 0.18                                                   | 3.88                                                    | Frerichs et al 1995                                          |
| rabbit   | 0.69 ± 0.05                                                   | 7.93                                                    | Passero et al 1981                                           |
| cat      | 0.69 ± 0.19                                                   | 21.78                                                   | Chugani et al 1991<br>Sokoloff 1984                          |
| monkey   | 0.36 ± 0.03                                                   | 35.98                                                   | Kennedy et al 1978                                           |
| sheep    | 0.35 ± 0.03                                                   | 40.18                                                   | Pell et al 1983                                              |
| goat     | 0.35 ± 0.04                                                   | 40.09                                                   | Pelligrino et al 1987                                        |
| baboon   | 0.44 ± 0.08                                                   | 60.40                                                   | Meguro et al 1999                                            |
| human    | 0.31 ± 0.03                                                   | 428.55                                                  | Clarke et al 1994                                            |

Table S3.  
Visual cortex glucose utilization rate in mammals.

| Species        | Glucose utilization<br>( $\mu\text{mol}/g \cdot \text{min}$ ) | Reference                  |
|----------------|---------------------------------------------------------------|----------------------------|
| mouse          | $1.11 \pm 0.12$                                               | Quelven et al 2004, estim. |
| rat            | $0.86 \pm 0.14$                                               | Waschke et al 1993         |
| rat            | $0.82 \pm 0.12$                                               | Dube et al 2001            |
| rat            | $0.97 \pm 0.05$                                               | Nehling et al 1988         |
| rat            | $1.00 \pm 0.10$                                               | Nehling et al 2000         |
| average rat    | $0.91 \pm 0.11$                                               |                            |
| rabbit         | $0.76 \pm 0.09$                                               | Passero et al 1981         |
| cat            | $0.52 \pm 0.03$                                               | Herdman et al 1989         |
| cat            | $0.95 \pm 0.09$                                               | Sokoloff 1984              |
| cat            | $0.89 \pm 0.03$                                               | Schwartzman et al 1986     |
| average cat    | $0.79 \pm 0.05$                                               |                            |
| monkey         | $0.59 \pm 0.02$                                               | Kennedy et al 1978         |
| monkey         | $0.66 \pm 0.02$                                               | Palombo et al 1990         |
| average monkey | $0.63 \pm 0.02$                                               |                            |
| human          | $0.39 \pm 0.05$                                               | De Volder et al 1997       |
| human          | $0.37 \pm 0.04$                                               | Heiss et al 1985           |
| average human  | $0.38 \pm 0.05$                                               |                            |

Table S4.  
Prefrontal cortex glucose utilization rate in mammals

| Species     | Glucose utilization<br>( $\mu\text{mol}/g \cdot \text{min}$ ) | Reference             |
|-------------|---------------------------------------------------------------|-----------------------|
| mouse       | $1.22 \pm 0.12$                                               | Bouilleret et al 2000 |
| rat         | $0.99 \pm 0.15$                                               | Dube et al 2001       |
| rat         | $1.03 \pm 0.05$                                               | Nehling et al 1988    |
| rat         | $0.91 \pm 0.21$                                               | Zocchi et al 2001     |
| average rat | $0.98 \pm 0.14$                                               |                       |
| monkey      | $0.40 \pm 0.03$                                               | Porrino et al 2002    |
| baboon      | $0.52 \pm 0.14$                                               | Meguro et al 1999     |
| human       | $0.33 \pm 0.04$                                               | Blin et al 1991       |

Table S5.  
Frontal cortex glucose utilization rate in mammals.

| Species        | Glucose utilization<br>( $\mu\text{mol}/\text{g} \cdot \text{min}$ ) | Reference             |
|----------------|----------------------------------------------------------------------|-----------------------|
| mouse          | $1.07 \pm 0.10$                                                      | Bouilleret et al 2000 |
| rat            | $0.84 \pm 0.16$                                                      | Dube et al 2001       |
| rat            | $0.86 \pm 0.04$                                                      | Levant et al 2004     |
| rat            | $0.78 \pm 0.09$                                                      | Waschke et al 1993    |
| average rat    | $0.83 \pm 0.10$                                                      |                       |
| monkey         | $0.34 \pm 0.08$                                                      | Noda et al 2002       |
| monkey         | $0.58 \pm 0.02$                                                      | Palombo et al 1990    |
| average monkey | $0.46 \pm 0.05$                                                      |                       |
| human          | $0.37 \pm 0.09$                                                      | De Volder et al 1997  |
| human          | $0.28 \pm 0.02$                                                      | Redies et al 1989     |
| human          | $0.25 \pm 0.01$                                                      | Blomqvist et al 1998  |
| human          | $0.41 \pm 0.02$                                                      | Heiss et al 1985      |
| human          | $0.33 \pm 0.06$                                                      | Maquet et al 1992     |
| human          | $0.41 \pm 0.12$                                                      | Haier et al 1992      |
| average human  | $0.34 \pm 0.06$                                                      |                       |

Table S6.  
Cingulate cortex glucose utilization rate in mammals.

| Species        | Glucose utilization<br>( $\mu\text{mol}/\text{g} \cdot \text{min}$ ) | Reference                  |
|----------------|----------------------------------------------------------------------|----------------------------|
| mouse          | $1.06 \pm 0.12$                                                      | Quelven et al 2004, estim. |
| rat            | $0.91 \pm 0.16$                                                      | Dube et al 2001            |
| rat            | $1.21 \pm 0.05$                                                      | Levant et al 2004          |
| rat            | $0.83 \pm 0.09$                                                      | Blin et al 1991            |
| average rat    | $0.98 \pm 0.10$                                                      |                            |
| cat            | $0.70 \pm 0.06$                                                      | Schwartzman et al 1986     |
| monkey         | $0.37 \pm 0.09$                                                      | Noda et al 2002            |
| monkey         | $0.40 \pm 0.02$                                                      | Palombo et al 1990         |
| average monkey | $0.39 \pm 0.06$                                                      |                            |
| baboon         | $0.49 \pm 0.17$                                                      | Meguro et al 1999          |
| human          | $0.31 \pm 0.02$                                                      | Blin et al 1991            |



Table S7.  
Temporal cortex glucose utilization rate in mammals.

| Species        | Glucose utilization<br>( $\mu\text{mol}/\text{g} \cdot \text{min}$ ) | Reference                        |
|----------------|----------------------------------------------------------------------|----------------------------------|
| mouse          | $0.93 \pm 0.10$                                                      | Quelven et al 2004, estim        |
| rat            | $1.08 \pm 0.12$                                                      | Waschke et al 1993, auditory     |
| rat            | $0.94 \pm 0.13$                                                      | Dube et al 2001                  |
| rat            | $1.45 \pm 0.04$                                                      | Nehling et al 1988, auditory     |
| rat            | $1.34 \pm 0.11$                                                      | Nehling et al 2000, auditory     |
| rat            | $1.22 \pm 0.08$                                                      | Levant et al 2004                |
| rat            | $1.34 \pm 0.08$                                                      | Zocchi et al 2001, auditory      |
| average rat    | $1.23 \pm 0.10$                                                      |                                  |
| rabbit         | $1.02 \pm 0.10$                                                      | Passero et al 1981               |
| cat            | $0.97 \pm 0.09$                                                      | Schwartzman et al 1986, auditory |
| cat            | $1.18 \pm 0.04$                                                      | Sokoloff 1984, auditory          |
| cat            | $1.05 \pm 0.08$                                                      | Lydic et al 1991                 |
| average cat    | $1.07 \pm 0.08$                                                      |                                  |
| monkey         | $0.36 \pm 0.07$                                                      | Noda et al 2002                  |
| monkey         | $0.40 \pm 0.02$                                                      | Porrino et al 2002               |
| monkey         | $0.79 \pm 0.04$                                                      | Kennedy et al 1978, auditory     |
| average monkey | $0.52 \pm 0.04$                                                      |                                  |
| baboon         | $0.47 \pm 0.14$                                                      | Meguro et al 1999                |
| human          | $0.23 \pm 0.02$                                                      | Blomqvist et al 1998             |
| human          | $0.37 \pm 0.03$                                                      | Heiss et al 1985                 |
| human          | $0.31 \pm 0.08$                                                      | Haier et al 1992                 |
| human          | $0.36 \pm 0.06$                                                      | De Volder et al 1997             |
| human          | $0.32 \pm 0.03$                                                      | Redies et al 1989                |
| human          | $0.30 \pm 0.06$                                                      | Maquet et al 1992                |
| average human  | $0.32 \pm 0.05$                                                      |                                  |

Table S8.

Sensorimotor cortex glucose utilization rate in mammals.

| Species       | Glucose utilization<br>( $\mu\text{mol}/\text{g} \cdot \text{min}$ ) | Reference             |
|---------------|----------------------------------------------------------------------|-----------------------|
| mouse         | $1.21 \pm 0.09$                                                      | Bouilleret et al 2000 |
| rat           | $0.84 \pm 0.13$                                                      | Dube et al 2001       |
| rat           | $0.89 \pm 0.07$                                                      | Waschke et al 1993    |
| rat           | $0.90 \pm 0.07$                                                      | Zocchi et al 2001     |
| rat           | $0.90 \pm 0.09$                                                      | Nehlig et al 2000     |
| average rat   | $0.88 \pm 0.09$                                                      |                       |
| rabbit        | $0.83 \pm 0.07$                                                      | Passero et al 1981    |
| cat           | $0.64 \pm 0.03$                                                      | Sokoloff 1984         |
| monkey        | $0.44 \pm 0.03$                                                      | Kennedy et al 1978    |
| baboon        | $0.49 \pm 0.08$                                                      | Meguro et al 1999     |
| human         | $0.42 \pm 0.03$                                                      | Heiss et al 1985      |
| human         | $0.33 \pm 0.03$                                                      | Blin et al 1991       |
| average human | $0.38 \pm 0.03$                                                      |                       |

Table S9.

Occipital cortex glucose utilization rate in mammals.

| Species       | Glucose utilization<br>( $\mu\text{mol}/\text{g} \cdot \text{min}$ ) | Reference            |
|---------------|----------------------------------------------------------------------|----------------------|
| rat           | $1.00 \pm 0.07$                                                      | Levant et al 2004    |
| rat           | $0.83 \pm 0.09$                                                      | Blin et al 1991      |
| average rat   | $0.92 \pm 0.08$                                                      |                      |
| cat           | $1.26 \pm 0.10$                                                      | Lydic et al 1991     |
| monkey        | $0.40 \pm 0.09$                                                      | Noda et al 2002      |
| baboon        | $0.33 \pm 0.06$                                                      | Meguro et al 1999    |
| human         | $0.32 \pm 0.03$                                                      | Redies et al 1989    |
| human         | $0.28 \pm 0.02$                                                      | Blomqvist et al 1998 |
| human         | $0.29 \pm 0.05$                                                      | Maquet et al 1992    |
| human         | $0.42 \pm 0.12$                                                      | Haier et al 1992     |
| human         | $0.33 \pm 0.04$                                                      | Bline et al 1991     |
| average human | $0.33 \pm 0.05$                                                      |                      |

Table S10.  
Parietal cortex glucose utilization rate in mammals.

| Species       | Glucose utilization<br>( $\mu\text{mol}/\text{g} \cdot \text{min}$ ) | Reference            |
|---------------|----------------------------------------------------------------------|----------------------|
| rat           | $0.77 \pm 0.08$                                                      | Waschke et al 1993   |
| rat           | $0.89 \pm 0.11$                                                      | Dube et al 2001      |
| rat           | $0.96 \pm 0.04$                                                      | Levant et al 2004    |
| average rat   | $0.87 \pm 0.12$                                                      |                      |
| rabbit        | $0.73 \pm 0.08$                                                      | Passero et al 1981   |
| cat           | $0.69 \pm 0.08$                                                      | Sokoloff 1984        |
| monkey        | $0.47 \pm 0.04$                                                      | Kennedy et al 1978   |
| baboon        | $0.47 \pm 0.10$                                                      | Meguro et al 1999    |
| human         | $0.27 \pm 0.02$                                                      | Blomqvist et al 1998 |
| human         | $0.37 \pm 0.02$                                                      | Heiss et al 1985     |
| human         | $0.43 \pm 0.15$                                                      | Haier et al 1992     |
| human         | $0.33 \pm 0.04$                                                      | Blin et al 1991      |
| average human | $0.35 \pm 0.05$                                                      |                      |

Table S11.  
Cerebral cortex average glucose utilization rate in mammals.  
Data for Fig. 2E in the main text.

| Species | Glucose utilization<br>( $\mu\text{mol}/\text{g} \cdot \text{min}$ ) | Number of areas |
|---------|----------------------------------------------------------------------|-----------------|
| mouse   | $1.10 \pm 0.11$                                                      | N=6             |
| rat     | $0.95 \pm 0.11$                                                      | N=8             |
| rabbit  | $0.84 \pm 0.09$                                                      | N=4             |
| cat     | $0.86 \pm 0.08$                                                      | N=6             |
| monkey  | $0.46 \pm 0.06$                                                      | N=8             |
| baboon  | $0.46 \pm 0.13$                                                      | N=6             |
| human   | $0.34 \pm 0.05$                                                      | N=8             |

Table S12.

Cerebral cortex average glucose utilization rate in mammals.

Data for Fig. S1 in the Supplementary Information.

| Species        | Glucose utilization<br>( $\mu\text{mol}/g \cdot \text{min}$ ) | Number of areas | Reference              |
|----------------|---------------------------------------------------------------|-----------------|------------------------|
| mouse          | $1.07 \pm 0.10$                                               | N=5             | Bouilleret et al 2000  |
| rat            | $0.97 \pm 0.04$                                               | N=8             | Nehling et al 1988     |
| rat            | $0.83 \pm 0.13$                                               | N=10            | Dube et al 2001        |
| rat            | $0.88 \pm 0.06$                                               | N=9             | Levant et al 2004      |
| rat            | $0.95 \pm 0.13$                                               | N=7             | Zocchi et al 2001      |
| rat            | $0.88 \pm 0.10$                                               | N=5             | Waschke et al 1993     |
| average rat    | $0.90 \pm 0.09$                                               |                 |                        |
| rabbit         | $0.83 \pm 0.08$                                               | N=5             | Passero et al 1981     |
| cat            | $0.78 \pm 0.12$                                               | N=5             | Chugani et al 1991     |
| cat            | $0.87 \pm 0.06$                                               | N=4             | Sokoloff 1984          |
| cat            | $0.79 \pm 0.04$                                               | N=5             | Schwartzman et al 1986 |
| average cat    | $0.81 \pm 0.11$                                               |                 |                        |
| monkey         | $0.43 \pm 0.03$                                               | N=11            | Porrino et al 2002     |
| monkey         | $0.51 \pm 0.03$                                               | N=10            | Palombo et al 1990     |
| monkey         | $0.37 \pm 0.08$                                               | N=3             | Noda et al 2002        |
| monkey         | $0.57 \pm 0.03$                                               | N=4             | Kennedy et al 1978     |
| average monkey | $0.47 \pm 0.04$                                               |                 |                        |
| baboon         | $0.46 \pm 0.10$                                               | N=6             | Meguro et al 1999      |
| human          | $0.37 \pm 0.07$                                               | N=4             | De Volder et al 1997   |
| human          | $0.26 \pm 0.02$                                               | N=4             | Blomqvist et al 1998   |
| human          | $0.39 \pm 0.03$                                               | N=9             | Heiss et al 1985       |
| human          | $0.33 \pm 0.04$                                               | N=6             | Blin et al 1991        |
| average human  | $0.34 \pm 0.04$                                               |                 |                        |

Table S13.  
Thalamus glucose utilization rate in mammals.

| Species        | Glucose utilization<br>( $\mu\text{mol}/\text{g} \cdot \text{min}$ ) | Reference                  |
|----------------|----------------------------------------------------------------------|----------------------------|
| mouse          | $1.19 \pm 0.10$                                                      | Bouilleret et al 2000      |
| mouse          | $1.03 \pm 0.10$                                                      | Quelven et al 2004, estim. |
| average mouse  | $1.11 \pm 0.10$                                                      |                            |
| rat            | $0.92 \pm 0.03$                                                      | Nehling et al 1988         |
| rat            | $0.88 \pm 0.08$                                                      | Nehling et al 2000         |
| rat            | $0.94 \pm 0.14$                                                      | Dube et al 2001            |
| rat            | $0.98 \pm 0.05$                                                      | Levant et al 2004          |
| rat            | $0.72 \pm 0.09$                                                      | Waschke et al 1993         |
| average rat    | $0.89 \pm 0.09$                                                      |                            |
| rabbit         | $0.90 \pm 0.05$                                                      | Passero et al 1981         |
| cat            | $0.81 \pm 0.11$                                                      | Schwartzman et al 1986     |
| cat            | $0.85 \pm 0.15$                                                      | Chugani et al 1991         |
| cat            | $0.86 \pm 0.08$                                                      | Sokoloff 1984              |
| average cat    | $0.84 \pm 0.12$                                                      |                            |
| monkey         | $0.41 \pm 0.04$                                                      | Porrino et al 2002         |
| monkey         | $0.47 \pm 0.02$                                                      | Kennedy et al 1978         |
| monkey         | $0.46 \pm 0.03$                                                      | Palombo et al 1990         |
| average monkey | $0.45 \pm 0.03$                                                      |                            |
| baboon         | $0.51 \pm 0.16$                                                      | Meguro et al 1999          |
| human          | $0.39 \pm 0.05$                                                      | De Volder et al 1997       |
| human          | $0.27 \pm 0.02$                                                      | Blomqvist et al 1998       |
| human          | $0.36 \pm 0.03$                                                      | Heiss et al 1985           |
| human          | $0.32 \pm 0.04$                                                      | Blin et al 1991            |
| human          | $0.35 \pm 0.05$                                                      | Maquet et al 1992          |
| average human  | $0.34 \pm 0.04$                                                      |                            |

Table S14.  
Cerebellum glucose utilization rate in mammals.

| Species        | Glucose utilization<br>( $\mu\text{mol}/\text{g} \cdot \text{min}$ ) | Reference                  |
|----------------|----------------------------------------------------------------------|----------------------------|
| mouse          | $0.98 \pm 0.10$                                                      | Quelven et al 2004, estim. |
| rat            | $0.61 \pm 0.02$                                                      | Nehling et al 1988         |
| rat            | $0.68 \pm 0.08$                                                      | Dube et al 2001            |
| rat            | $0.57 \pm 0.12$                                                      | Waschke et al 1993         |
| average rat    | $0.62 \pm 0.07$                                                      |                            |
| cat            | $0.71 \pm 0.08$                                                      | Sokoloff 1984              |
| cat            | $0.65 \pm 0.13$                                                      | Chugani et al 1991         |
| average cat    | $0.68 \pm 0.11$                                                      |                            |
| monkey         | $0.38 \pm 0.02$                                                      | Kennedy et al 1978         |
| monkey         | $0.27 \pm 0.06$                                                      | Noda et al 2002            |
| monkey         | $0.46 \pm 0.03$                                                      | Palombo et al 1990         |
| average monkey | $0.37 \pm 0.03$                                                      |                            |
| baboon         | $0.32 \pm 0.05$                                                      | Meguro et al 1999          |
| human          | $0.33 \pm 0.05$                                                      | De Volder et al 1997       |
| human          | $0.28 \pm 0.02$                                                      | Blomqvist et al 1998       |
| human          | $0.32 \pm 0.06$                                                      | Heiss et al 1985           |
| human          | $0.29 \pm 0.03$                                                      | Blin et al 1991            |
| human          | $0.24 \pm 0.07$                                                      | Maquet et al 1992          |
| average human  | $0.29 \pm 0.05$                                                      |                            |

Table S15.  
Hypothalamus glucose utilization rate in mammals.

| Species                 | Glucose utilization<br>( $\mu\text{mol}/g \cdot \text{min}$ ) | Reference                  |
|-------------------------|---------------------------------------------------------------|----------------------------|
| mouse                   | $0.59 \pm 0.14$                                               | Bouilleret et al 2000      |
| mouse                   | $0.56 \pm 0.10$                                               | Quelven et al 2004, estim. |
| average mouse           | $0.58 \pm 0.12$                                               |                            |
| rat                     | $0.48 \pm 0.02$                                               | Nehling et al 1988         |
| rat                     | $0.49 \pm 0.09$                                               | Dube et al 2001            |
| rat                     | $0.44 \pm 0.03$                                               | Levant et al 2004          |
| rat                     | $0.39 \pm 0.05$                                               | Waschke et al 1993         |
| rat                     | $0.54 \pm 0.05$                                               | Nehling et al 2000         |
| rat                     | $0.40 \pm 0.04$                                               | Blin et al 1991            |
| average rat             | $0.46 \pm 0.05$                                               |                            |
| rabbit                  | $0.62 \pm 0.03$                                               | Passero et al 1981         |
| cat                     | $0.41 \pm 0.06$                                               | Chugani et al 1991         |
| cat                     | $0.41 \pm 0.04$                                               | Sokoloff 1984              |
| average cat             | $0.41 \pm 0.05$                                               |                            |
| monkey                  | $0.30 \pm 0.03$                                               | Porrino et al 2002         |
| monkey                  | $0.26 \pm 0.04$                                               | Kennedy et al 1978         |
| average monkey          | $0.28 \pm 0.04$                                               |                            |
| human                   | $0.27 \pm 0.02$                                               | Blin et al 1991            |
| <i>Mammillary body:</i> |                                                               |                            |
| mouse                   | $1.56 \pm 0.13$                                               | Bouilleret et al 2000      |
| rat                     | $1.03 \pm 0.04$                                               | Nehling et al 1988         |
| rat                     | $1.04 \pm 0.17$                                               | Dube et al 2001            |
| rat                     | $0.76 \pm 0.05$                                               | Waschke et al 1993         |
| average rat             | $0.94 \pm 0.09$                                               |                            |
| rabbit                  | $0.68 \pm 0.03$                                               | Passero et al 1981         |
| cat                     | $0.99 \pm 0.32$                                               | Chugani et al 1991         |
| cat                     | $0.85 \pm 0.03$                                               | Sokoloff 1984              |
| average cat             | $0.92 \pm 0.18$                                               |                            |
| monkey                  | $0.57 \pm 0.06$                                               | Palombo et al 1990         |
| monkey                  | $0.57 \pm 0.03$                                               | Kennedy et al 1978         |
| average monkey          | $0.57 \pm 0.05$                                               |                            |

Table S16.

Hippocampus glucose utilization rate in mammals.

| Species        | Glucose utilization<br>( $\mu\text{mol}/\text{g} \cdot \text{min}$ ) | Reference                            |
|----------------|----------------------------------------------------------------------|--------------------------------------|
| mouse          | $0.84 \pm 0.13$                                                      | Bouilleret et al 2000, CA1+CA3       |
| rat            | $0.60 \pm 0.05$                                                      | Waschke et al 1993, CA1+CA3          |
| rat            | $0.63 \pm 0.08$                                                      | Dube et al 2001, CA1+CA3             |
| rat            | $0.64 \pm 0.03$                                                      | Nehling et al 1988, dorsal + ventral |
| rat            | $0.56 \pm 0.03$                                                      | Levant et al 2004                    |
| rat            | $0.62 \pm 0.03$                                                      | Zocchi et al 2001, CA1+CA3           |
| average rat    | $0.61 \pm 0.04$                                                      |                                      |
| rabbit         | $0.58 \pm 0.03$                                                      | Passero et al 1981                   |
| cat            | $0.52 \pm 0.15$                                                      | Chugani et al 1991, dorsal + ventral |
| cat            | $0.54 \pm 0.04$                                                      | Lydic et al 1991                     |
| cat            | $0.57 \pm 0.05$                                                      | Sokoloff 1984                        |
| average cat    | $0.54 \pm 0.10$                                                      |                                      |
| monkey         | $0.32 \pm 0.05$                                                      | Noda et al 2002                      |
| monkey         | $0.37 \pm 0.02$                                                      | Porrino et al 2002                   |
| monkey         | $0.33 \pm 0.01$                                                      | Palombo et al 1990                   |
| monkey         | $0.39 \pm 0.02$                                                      | Kennedy et al 1978                   |
| average monkey | $0.35 \pm 0.03$                                                      |                                      |
| baboon         | $0.32 \pm 0.07$                                                      | Meguro et al 1999                    |
| human          | $0.37 \pm 0.05$                                                      | Heiss et al 1985                     |
| human          | $0.23 \pm 0.07$                                                      | Maquet et al 1992                    |
| human          | $0.23 \pm 0.03$                                                      | Blin et al 1991                      |
| average human  | $0.28 \pm 0.05$                                                      |                                      |



Table S17.  
Amygdala glucose utilization rate in mammals.

| Species        | Glucose utilization<br>( $\mu\text{mol}/g \cdot \text{min}$ ) | Reference             |
|----------------|---------------------------------------------------------------|-----------------------|
| mouse          | $0.58 \pm 0.10$                                               | Bouilleret et al 2000 |
| rat            | $0.67 \pm 0.07$                                               | Dube et al 2001       |
| rat            | $0.52 \pm 0.02$                                               | Nehling et al 1988    |
| rat            | $0.44 \pm 0.03$                                               | Levant et al 2004     |
| rat            | $0.57 \pm 0.06$                                               | Nehling et al 2000    |
| rat            | $0.40 \pm 0.07$                                               | Waschke et al 1993    |
| average rat    | $0.52 \pm 0.05$                                               |                       |
| rabbit         | $0.39 \pm 0.01$                                               | Passero et al 1981    |
| cat            | $0.54 \pm 0.06$                                               | Chugani et al 1991    |
| cat            | $0.34 \pm 0.04$                                               | Sokoloff 1984         |
| average cat    | $0.44 \pm 0.05$                                               |                       |
| monkey         | $0.33 \pm 0.01$                                               | Porrino et al 2002    |
| monkey         | $0.38 \pm 0.02$                                               | Palombo et al 1990    |
| monkey         | $0.25 \pm 0.02$                                               | Kennedy et al 1978    |
| average monkey | $0.32 \pm 0.02$                                               |                       |
| human          | $0.21 \pm 0.03$                                               | Blin et al 1991       |

Table S18.  
Septum glucose utilization rate in mammals.

| Species        | Glucose utilization<br>( $\mu\text{mol}/g \cdot \text{min}$ ) | Reference                  |
|----------------|---------------------------------------------------------------|----------------------------|
| mouse          | $0.67 \pm 0.12$                                               | Bouillere et al 2000       |
| mouse          | $0.79 \pm 0.03$                                               | Quelven et al 2004, estim. |
| average mouse  | $0.73 \pm 0.08$                                               |                            |
| rat            | $0.48 \pm 0.03$                                               | Waschke et al 1993         |
| rat            | $0.47 \pm 0.08$                                               | Dube et al 2001            |
| rat            | $0.61 \pm 0.02$                                               | Nehling et al 1988         |
| rat            | $0.45 \pm 0.05$                                               | Nehling et al 2000         |
| rat            | $0.45 \pm 0.03$                                               | Levant et al 2004          |
| rat            | $0.61 \pm 0.07$                                               | Zocchi et al 2001          |
| average rat    | $0.51 \pm 0.05$                                               |                            |
| rabbit         | $0.48 \pm 0.02$                                               | Passero et al 1981         |
| cat            | $0.37 \pm 0.05$                                               | Chugani et al 1991         |
| cat            | $0.39 \pm 0.03$                                               | Sokoloff 1984              |
| average cat    | $0.38 \pm 0.04$                                               |                            |
| monkey         | $0.30 \pm 0.03$                                               | Porrino et al 2002         |
| monkey         | $0.27 \pm 0.01$                                               | Palombo 1990               |
| monkey         | $0.26 \pm 0.02$                                               | Kennedy 1978               |
| average monkey | $0.28 \pm 0.02$                                               |                            |

Table S19.

Caudate glucose utilization rate in mammals.

| Species        | Glucose utilization<br>( $\mu\text{mol}/\text{g} \cdot \text{min}$ ) | Reference              |
|----------------|----------------------------------------------------------------------|------------------------|
| mouse          | $1.25 \pm 0.16$                                                      | Bouillere et al 2000   |
| rat            | $0.85 \pm 0.04$                                                      | Nehling et al 1988     |
| rat            | $0.82 \pm 0.14$                                                      | Dube et al 2001        |
| rat            | $0.82 \pm 0.06$                                                      | Waschke et al 1993     |
| rat            | $0.85 \pm 0.09$                                                      | Nehling et al 2000     |
| rat            | $0.77 \pm 0.09$                                                      | Blin et al 1991        |
| rat            | $0.87 \pm 0.07$                                                      | Zocchi et al 2001      |
| average rat    | $0.83 \pm 0.09$                                                      |                        |
| cat            | $0.77 \pm 0.06$                                                      | Schwartzman et al 1986 |
| cat            | $0.83 \pm 0.11$                                                      | Chugani et al 1991     |
| cat            | $0.77 \pm 0.02$                                                      | Sokoloff 1984          |
| average cat    | $0.79 \pm 0.10$                                                      |                        |
| monkey         | $0.60 \pm 0.04$                                                      | Porrino et al 2002     |
| monkey         | $0.52 \pm 0.03$                                                      | Kennedy et al 1978     |
| monkey         | $0.51 \pm 0.03$                                                      | Palombo et al 1990     |
| average monkey | $0.54 \pm 0.04$                                                      |                        |
| baboon         | $0.41 \pm 0.08$                                                      | Meguro et al 1999      |
| human          | $0.32 \pm 0.06$                                                      | Blin et al 1991        |
| human          | $0.39 \pm 0.04$                                                      | Heiss et al 1985       |
| human          | $0.35 \pm 0.06$                                                      | Maquet et al 1992      |
| average human  | $0.35 \pm 0.06$                                                      |                        |

Table S20.  
Substantia nigra glucose utilization rate in mammals.

| Species        | Glucose utilization<br>( $\mu\text{mol}/\text{g} \cdot \text{min}$ ) | Reference              |
|----------------|----------------------------------------------------------------------|------------------------|
| mouse          | $0.88 \pm 0.07$                                                      | Bouilleret et al 2000  |
| rat            | $0.57 \pm 0.01$                                                      | Nehling et al 1988     |
| rat            | $0.52 \pm 0.08$                                                      | Waschke et al 1993     |
| rat            | $0.56 \pm 0.04$                                                      | Nehling et al 2000     |
| rat            | $0.52 \pm 0.03$                                                      | Levant et al 2004      |
| rat            | $0.49 \pm 0.09$                                                      | Blin et al 1991        |
| average rat    | $0.53 \pm 0.04$                                                      |                        |
| rabbit         | $0.48 \pm 0.03$                                                      | Passero et al 1981     |
| cat            | $0.34 \pm 0.03$                                                      | Schwartzman et al 1986 |
| cat            | $0.46 \pm 0.06$                                                      | Chugani et al 1991     |
| cat            | $0.40 \pm 0.05$                                                      | Sokoloff et al 1984    |
| average cat    | $0.40 \pm 0.05$                                                      |                        |
| monkey         | $0.44 \pm 0.01$                                                      | Porrino et al 2002     |
| monkey         | $0.29 \pm 0.03$                                                      | Kennedy et al 1978     |
| monkey         | $0.37 \pm 0.01$                                                      | Palombo et al 1990     |
| average monkey | $0.37 \pm 0.02$                                                      |                        |
| human          | $0.26 \pm 0.05$                                                      | Blin et al 1991        |

Table S21.  
 Globus pallidus glucose utilization rate in mammals.

| Species        | Glucose utilization<br>( $\mu\text{mol}/\text{g} \cdot \text{min}$ ) | Reference              |
|----------------|----------------------------------------------------------------------|------------------------|
| mouse          | $0.76 \pm 0.03$                                                      | Bouilleret et al 2000  |
| rat            | $0.46 \pm 0.02$                                                      | Nehling et al 1988     |
| rat            | $0.42 \pm 0.04$                                                      | Dube et al 2001        |
| rat            | $0.45 \pm 0.05$                                                      | Waschke et al 1993     |
| rat            | $0.44 \pm 0.06$                                                      | Nehling et al 2000     |
| rat            | $0.57 \pm 0.05$                                                      | Zocchi et al 2001      |
| rat            | $0.44 \pm 0.04$                                                      | Levant et al 2004      |
| average rat    | $0.46 \pm 0.04$                                                      |                        |
| rabbit         | $0.42 \pm 0.02$                                                      | Passero et al 1981     |
| cat            | $0.38 \pm 0.04$                                                      | Schwartzman et al 1986 |
| cat            | $0.44 \pm 0.10$                                                      | Chugani et al 1991     |
| cat            | $0.36 \pm 0.02$                                                      | Sokoloff 1984          |
| average cat    | $0.39 \pm 0.05$                                                      |                        |
| monkey         | $0.31 \pm 0.04$                                                      | Porrino et al 2002     |
| monkey         | $0.26 \pm 0.02$                                                      | Kennedy et al 1978     |
| monkey         | $0.27 \pm 0.02$                                                      | Palombo et al 1990     |
| average monkey | $0.28 \pm 0.03$                                                      |                        |

Table S22.

Brain stem glucose utilization rate in mammals.

| Species                     | Glucose utilization<br>( $\mu\text{mol}/\text{g} \cdot \text{min}$ ) | Reference                  |
|-----------------------------|----------------------------------------------------------------------|----------------------------|
| <i>Superior colliculus:</i> |                                                                      |                            |
| mouse                       | $0.93 \pm 0.08$                                                      | Bouilleret et al 2000      |
| mouse                       | $0.87 \pm 0.10$                                                      | Quelven et al 2004, estim. |
| average mouse               | $0.90 \pm 0.09$                                                      |                            |
| rat                         | $0.76 \pm 0.03$                                                      | Nehling et al 1988         |
| rat                         | $0.67 \pm 0.13$                                                      | Dube et al 2001            |
| rat                         | $0.71 \pm 0.05$                                                      | Waschke et al 1993         |
| rat                         | $0.73 \pm 0.07$                                                      | Levant et al 2004          |
| average rat                 | $0.72 \pm 0.08$                                                      |                            |
| rabbit                      | $0.62 \pm 0.01$                                                      | Passero et al 1981         |
| cat                         | $0.86 \pm 0.20$                                                      | Chugani et al 1991         |
| cat                         | $0.82 \pm 0.08$                                                      | Sokoloff 1984              |
| average cat                 | $0.84 \pm 0.14$                                                      |                            |
| monkey                      | $0.55 \pm 0.04$                                                      | Kennedy et al 1978         |
| monkey                      | $0.55 \pm 0.03$                                                      | Palombo et al 1990         |
| average monkey              | $0.55 \pm 0.04$                                                      |                            |
| <i>Inferior colliculus:</i> |                                                                      |                            |
| mouse                       | $0.99 \pm 0.05$                                                      | Quelven et al 2004, estim. |
| rat                         | $1.64 \pm 0.05$                                                      | Nehling et al 1988         |
| rat                         | $1.70 \pm 0.15$                                                      | Nehling et al 2000         |
| rat                         | $1.14 \pm 0.22$                                                      | Dube et al 2001            |
| rat                         | $1.27 \pm 0.25$                                                      | Waschke et al 1993         |
| rat                         | $1.71 \pm 0.05$                                                      | Levant et al 2004          |
| average rat                 | $1.49 \pm 0.20$                                                      |                            |
| rabbit                      | $1.26 \pm 0.03$                                                      | Passero et al 1981         |
| cat                         | $2.03 \pm 0.74$                                                      | Chugani et al 1991         |
| cat                         | $1.71 \pm 0.20$                                                      | Sokoloff 1984              |
| average cat                 | $1.87 \pm 0.50$                                                      |                            |
| monkey                      | $1.03 \pm 0.06$                                                      | Kennedy et al 1978         |
| monkey                      | $1.30 \pm 0.05$                                                      | Palombo et al 1990         |
| average monkey              | $1.17 \pm 0.06$                                                      |                            |

Table S23.  
White matter glucose utilization rate in mammals.

| Species                 | Glucose utilization<br>( $\mu\text{mol}/\text{g} \cdot \text{min}$ ) | Reference                  |
|-------------------------|----------------------------------------------------------------------|----------------------------|
| <i>Corpus callosum</i>  |                                                                      |                            |
| mouse                   | $0.47 \pm 0.10$                                                      | Quelven et al 2004, estim. |
| rat                     | $0.29 \pm 0.03$                                                      | Waschke et al 1993         |
| rat                     | $0.22 \pm 0.02$                                                      | Nehlig et al 2000          |
| average rat             | $0.26 \pm 0.03$                                                      |                            |
| cat                     | $0.15 \pm 0.02$                                                      | Sokoloff 1984              |
| cat                     | $0.22 \pm 0.02$                                                      | Chugani et al 1991         |
| average cat             | $0.19 \pm 0.02$                                                      |                            |
| monkey                  | $0.11 \pm 0.00$                                                      | Kennedy et al 1978         |
| monkey                  | $0.11 \pm 0.01$                                                      | Palombo et al 1990         |
| average monkey          | $0.11 \pm 0.01$                                                      |                            |
| <i>Internal capsule</i> |                                                                      |                            |
| rat                     | $0.25 \pm 0.04$                                                      | Waschke et al 1993         |
| rat                     | $0.32 \pm 0.03$                                                      | Nehlig et al 1988          |
| average rat             | $0.29 \pm 0.04$                                                      |                            |
| rabbit                  | $0.26 \pm 0.03$                                                      | Passero et al 1981         |
| cat                     | $0.17 \pm 0.02$                                                      | Sokoloff et al 1984        |
| monkey                  | $0.13 \pm 0.01$                                                      | Kennedy et al 1978         |
| monkey                  | $0.11 \pm 0.02$                                                      | Palombo et al 1990         |
| average monkey          | $0.12 \pm 0.02$                                                      |                            |

### 3. Supplementary Methods.

In the above studies  $\text{CMR}_{\text{glc}}$  was measured by [ $^{14}\text{C}$ ]2-deoxyglucose (2DG) technique (Sokoloff et al, 1977) (all species except baboon and human) or its non-invasive modification [ $^{18}\text{F}$ ]fluoro-2-deoxy-D-glucose (FDG) (Phelps et al, 1979) (baboon, human, and one case of macaque (Noda et al, 2002)) under similar standard physiological conditions (Tables S2-S23). Thus the glucose data are directly

comparable. The measurements of  $CMR_{O_2}$  (Table S1) were performed either by the Ketty-Schmidt method (Ketty and Schmidt, 1948) (rat, sheep, macaque, baboon, human) or by other less-known techniques (cat, dog). However, a removal of cat and dog from the scaling plot in Fig. 1A does not change the oxygen metabolic exponent.

The values of glucose utilization for mouse taken from Quelven et al (2004) are estimates. These authors provide only ratios of glucose utilization in relation to corpus callosum. I obtained the absolute values by taking piriform cortex glucose utilization, which is recorded both in Quelven et al (2004) and in Bouilleret et al (2000), as a reference frame.

Data for brain volumes were taken either directly from the source or from standard sources (Stephan et al 1981; Hofman 1985):

Mouse:  $0.35 \text{ cm}^3$ , rat:  $2.26 \text{ cm}^3$ , squirrel:  $7.6 \text{ cm}^3$ , rabbit:  $11.5 \text{ cm}^3$ , cat:  $31.8 \text{ cm}^3$ , dog:  $72.0 \text{ cm}^3$ , macaque monkey:  $100.0 \text{ cm}^3$ , sheep:  $114.0 \text{ cm}^3$ , goat:  $117.0 \text{ cm}^3$ , baboon:  $137.0 \text{ cm}^3$ , human:  $1389.0 \text{ cm}^3$ .

## References

- Blin J., et al., *Brain Res.* **568**, 215-222 (1991).  
Blomqvist G., et al., *Acta Physiol. Scand.* **163**, 403-415 (1998).  
Bouilleret V., et al., *Brain Res.* **852**, 255-262 (2000).  
Chugani H.T., et al., *J. Cereb. Blood Flow Metabol.* **11**, 35-47 (1991).  
Clarke D.D. and Sokoloff L., In *Basic Neurochemistry*. Eds: Siegel G.J., et al. (Raven Press, New York, 1994), pp. 645-680.  
De Volder A.G., et al., *Brain Res.* **750**, 235-244 (1997).  
Dube C., et al., *Exper. Neurol.* **167**, 227-241 (2001).  
Frerichs K.U., et al., *Am. J. Physiol.* **268**, R445-R453 (1995).  
Haier R.J., et al., *Brain Res.* **570**, 134-143 (1992).  
Heiss W.-D., et al., *Brain Res.* **327**, 362-366 (1985).  
Herdman S.J., et al., *J. Neurosci.* **9**, 1150-1162 (1989).  
Hofman M.A., *Brain Behav. Evol.* **32**, 17-26 (1988).  
Kennedy C., et al., *Ann. Neurol* **4**, 293-301 (1978).  
Levant B. and Pazdernik T.L., *Brain Res.* **1003**, 159-167 (2004).



Linde R., et al., *Acta Physiol. Scand.* **165**, 395-401 (1999).  
 Lydic R., et al., *J. Comp. Neurol.* **304**, 517-529 (1991).  
 Madsen P.L., et al., *J. Appl. Physiol.* **70**, 2597-2601 (1991).  
 Meguro K., et al., *Brain* **122**, 1519-1531 (1999).  
 Nakanishi O. et al., *Can. J. Anaesth.* **44**, 1008-1013 (1997).  
 Nehlig A., et al., *J. Neurosci.* **8**, 2321-2333 (1988).  
 Nehlig A. and Boyet S., *Brain Res.* **858**, 71-77 (2000).  
 Nemoto E.M., et al., *J. Neurosurg. Anesthesiol.* **6**, 170-174 (1994).  
 Noda A., et al., *Brain Res.* **936**, 76-81 (2002).  
 Maquet P., et al., *Brain Res.* **571**, 149-153 (1992).  
 Palombo E., et al., *J. Neurosci.* **10**, 860-869 (1990).  
 Passero S., et al., *Neurosci. Lett.* **21**, 345-349 (1981).  
 Pell J.M. and Bergman E.N., *Am. J. Physiol.* **244**, E282-E289 (1983).  
 Pelligrino D.A., et al., *Am. J. Physiol.* **268**, R276-R283 (1987).  
 Porrino L.J., et al., *J. Neurosci.* **22**, 7687-7694 (2002).  
 Quelven I., et al., *Neurosci.* **126**, 441-449 (2004).  
 Redies C., et al., *Am. J. Physiol.* **256**, E805-E810 (1989).  
 Sahlin C., et al., *Brain Res.* **403**, 313-332 (1987).  
 Schwartzman R.J., et al., *Brain Res.* **398**, 113-120 (1986).  
 Sokoloff L., *Metabolic Probes of Central Nervous System Activity in Experimental Animals and Man*, (Sinauer, Sunderland, MA, 1984).  
 Stephan, H., Baron, G., and Frahm, H.D. New and revised data on volumes of brain structure in insectivores and primates. *Folia Primatol.* **35**, 1-29 (1981).  
 Stingele R., et al., *Am. J. Physiol.* **271**, H579-H587 (1996).  
 Waschke K., et al., *Am. J. Physiol.* **265**, H1243-H1248 (1993).  
 Zocchi A., et al., *Neurosci. Lett.* **306**, 177-180 (2001).

Methods for measuring metabolism can be found in:

Ketty S.S. and Schmidt C.F., *J. Clin. Invest.* **27**, 476-483 (1948).  
 Phelps M.E. et al, *Ann. Neurol.* **6**, 371-388 (1979).  
 Sokoloff L. et al., *J. Neurochem.* **28**, 897-916 (1977).
